# Supplementary material for: Photoluminescent electrospun submicron fibers of hybrid organosiloxane and derived silica
Source: Royal Society of Chemistry journal article supplement (doi:10.1039/c3ra23408h), 2013-01-01
Supplement: c3ra23408h.pdf [file c3ra23408h.pdf]

## Supporting Information

# Photoluminescent Electrospun Submicron Fibers of Hybrid Organosiloxane and Derived Silica

Jaba Mitra,<sup>a‡</sup> Monoj Ghosh,<sup>a‡</sup> Rajendra K. Bordia<sup>b</sup> and Ashutosh Sharma\*<sup>a</sup>

<sup>a</sup>Department of Chemical Engineering, Indian Institute of Technology, Kanpur; Kanpur-208016,  
India.

<sup>b</sup>Department of Materials Science and Engineering, University of Washington, Seattle, WA  
98195, USA. Supporting Information

Email: [ashutos@iitk.ac.in](mailto:ashutos@iitk.ac.in), Tel: +91-512-2597026

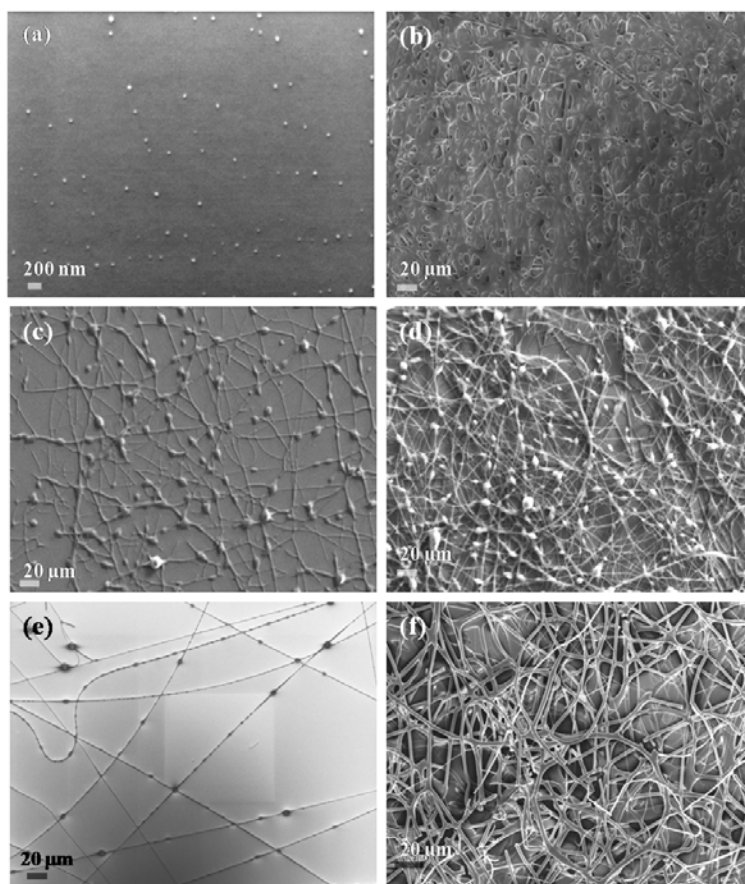

Fig.S1: FESEM micrographs of the products obtained by electrospinning at different volume ratios of the organic/pre-ceramic polymer blend: (a) PMHS, (b) 1:1, (c) 2:1, (d) 3:1, (e) 7:1, (f) 10:1. [Scale bars: (a) 200nm, (b)-(f) 20μm.]

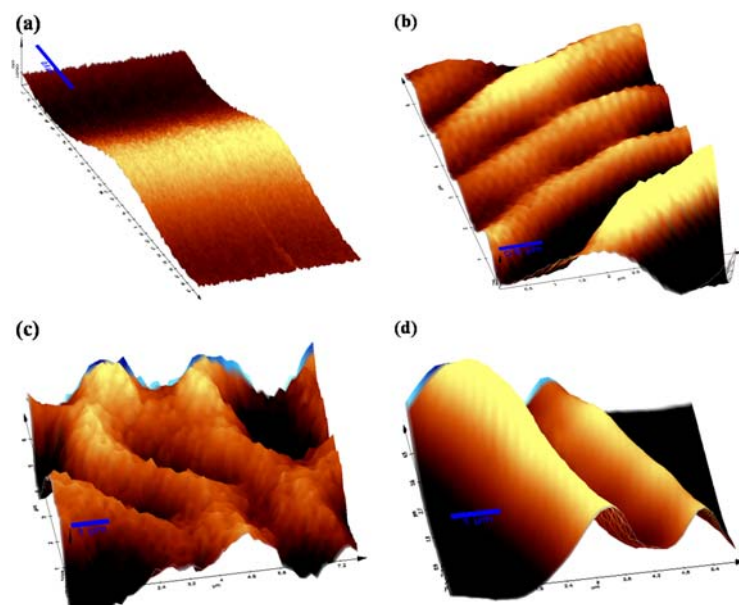

Fig.S2: Confocal micrographs of silica fibers at different calcinations temperatures: (a) 550 °C, (b) 800 °C, (c) 1000 °C and (d) 1400 °C.

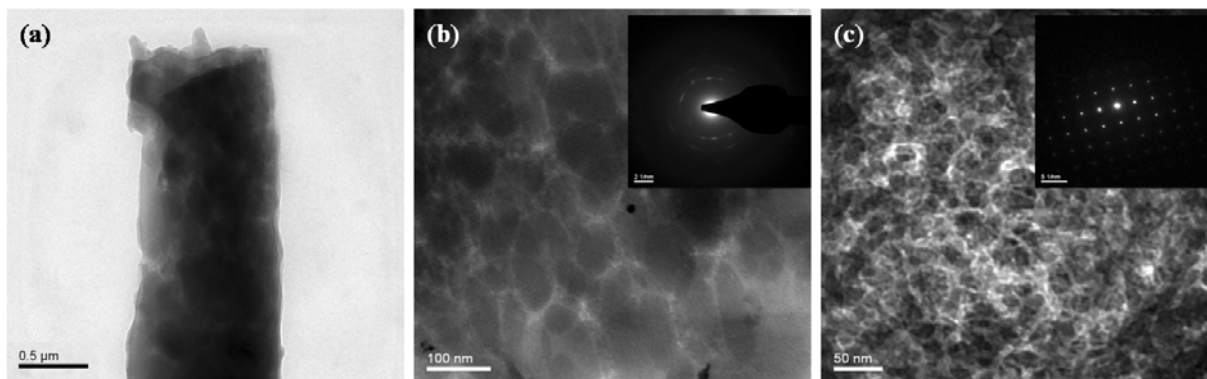

Fig.S3: TEM images ((a)-(c)) and SAED patterns (inset (b) and (c)) of fibers calcined at 800 °C ((a), (b),) and 1400 °C ((c)).

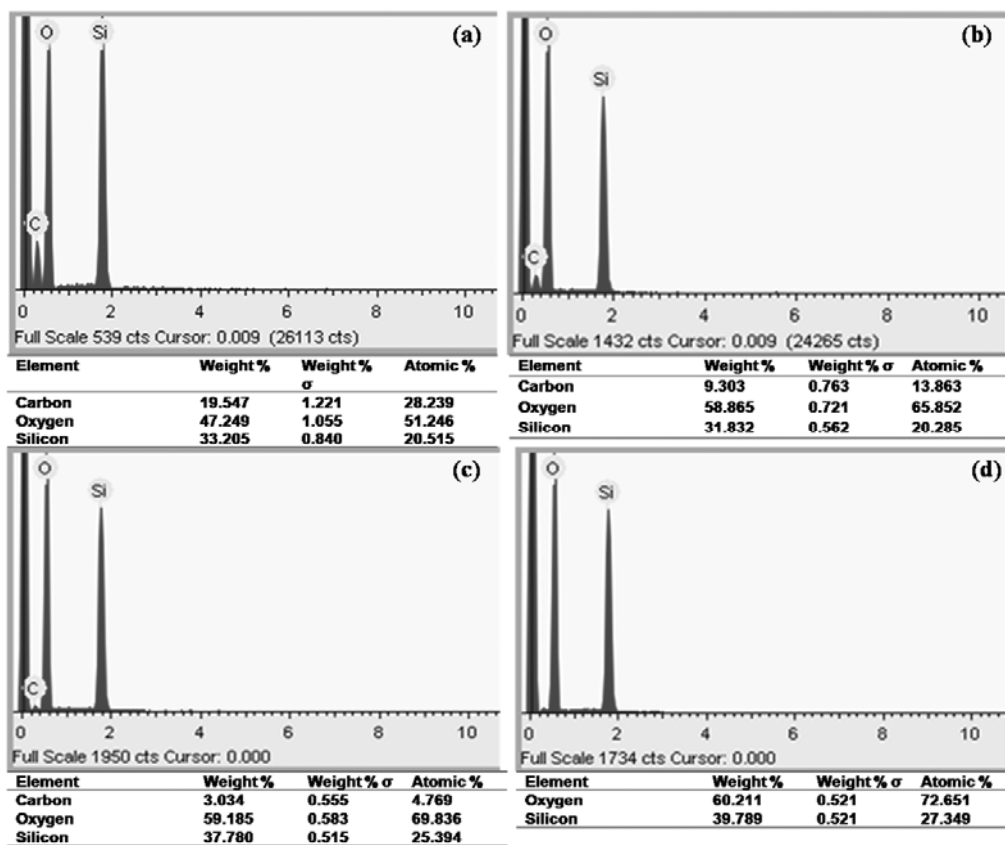

Fig.S4: EDX Spectrum of silica fibers at different calcinations temperatures: (a) 550 °C, (b) 800 °C, (c) 1000 °C and (d) 1400 °C.

Table S5: Crystal planes in silica calcined at 1400 °C.

| <b>2θ°</b> | <b>d-spacing (Å)</b> | <b>Crystal plane (hkl)</b> |
|------------|----------------------|----------------------------|
| 22.2       | 3.9703               | (101)                      |
| 28.8       | 3.09                 | (111)                      |
| 31.6       | 2.8109               | (102)                      |
| 36.5       | 2.4608               | (200)                      |

Scherrer formula for calculation of the average crystallite size, incorporating the full width at half-maximum (FWHM) of the major diffraction peak corresponding to the (101) crystal plane

$$\text{Crystallite size (avg.)} = \frac{k\lambda}{B\cos\theta}$$

$$\text{Lattice strain (mean lattice distortion)} = \frac{B}{4\tan\theta}$$

$$B_{\text{size}} = B_{\text{obsv}} - B_{\text{std}}$$

$$B_{\text{strain}} = (B_{\text{obsv}}^2 - B_{\text{std}}^2)^{0.5}$$

where, 'B<sup>0</sup>(2θ)' is the structural broadening, i.e. difference in the integral profile width between a standard and an unknown sample, and 'k', the Scherrer constant, 'θ', the Bragg's diffraction angle and 'λ', the wavelength of X-ray radiation used.

Computation of dislocation density (δ) following Williamson and Smallman's approach:

$$\delta = \frac{1}{D^2}$$

where, 'D' is the average crystallite size

Table S6: Crystallite size, dislocation density and lattice strain as a function of calcination temperature.

| Calcination temperature (°C) | Crystallite size, D (nm) | Dislocation density, $\delta$ | Lattice strain (%) |
|------------------------------|--------------------------|-------------------------------|--------------------|
| 800                          | 12.2                     | 0.0070                        | 1.476              |
| 1000                         | 15                       | 0.004                         | 1.205              |
| 1400                         | 34                       | 0.001                         | 0.527              |

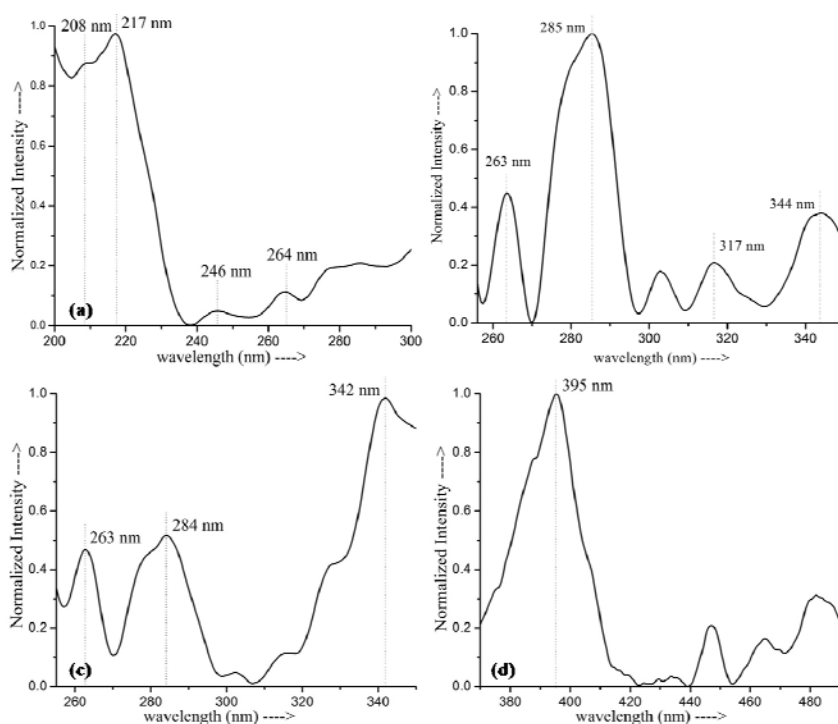

Fig. S7: PLE spectra of silica fibers calcined at 550 °C at  $\lambda_{\text{emission}}$  (a) 333 nm, (b) 410 nm, (c) 436 nm and (d) 537 nm.

Table S8: Lifetimes and their amplitudes of PMHS/PVP and silica fibers at different calcination temperatures, at  $\lambda_{\text{ex}} = 267$  nm and  $\lambda_{\text{em}} = 436$  nm.

| Sample type    | $A_1$ | $\tau_1$ (ns) | $A_2$ | $\tau_2$ (ns) |
|----------------|-------|---------------|-------|---------------|
| PMHS/PVP       | 0.869 | 2.594         | 0.131 | 14.310        |
| silica@550 °C  | 0.990 | 2.092         | 0.010 | 13.606        |
| silica@800 °C  | 0.996 | 1.678         | 0.004 | 12.582        |
| silica@1000 °C | 1.000 | 1.447         | -     | -             |
| silica@1400 °C | 0.999 | 1.343         | 0.001 | 11.216        |

The decays are fitted with biexponential functions:

$$I(t) = I(0)[A_1 \exp(-t/\tau_1) + A_2 \exp(-t/\tau_2)]$$

$\tau_1$  and  $\tau_2$  are the two lifetimes and  $A_1$  and  $A_2$  are the respective amplitudes, such that  $A_1 + A_2 = 1$ .

Table S9: Lifetimes and their amplitudes of silica fibers calcined at 550 °C at different emission wavelengths at  $\lambda_{\text{ex}} = 267$  nm.

| $\lambda_{\text{em}}$ (nm) | $A_1$ | $\tau_1$ (ns) | $A_2$ | $\tau_2$ (ns) |
|----------------------------|-------|---------------|-------|---------------|
| 333                        | 1     | 1.424         | -     | -             |
| 410                        | 0.896 | 2.059         | 0.014 | 13.845        |
| 436                        | 0.990 | 2.092         | 0.01  | 13.606        |
| 537                        | 1     | 2.266         | -     | -             |

Table S10: Lifetimes and their amplitudes of silica fibers calcined at 550 °C at  $\lambda_{\text{ex}}$  and  $\lambda_{\text{em}}$ .

| $\lambda_{\text{em}}$ (nm) | $\lambda_{\text{ex}}$ (nm) | $A_1$ | $\tau_1$ (ns) | $A_2$ | $\tau_2$ (ns) |
|----------------------------|----------------------------|-------|---------------|-------|---------------|
| 436                        | 267                        | 0.990 | 2.092         | 0.01  | 13.606        |
|                            | 385                        | 0.999 | 1.679         | 0.001 | 12.316        |
| 537                        | 267                        | 1     | 2.266         | -     | -             |
|                            | 385                        | 1.000 | 2.009         | -     | -             |
|                            | 488                        | 1.000 | 1.626         | -     | -             |

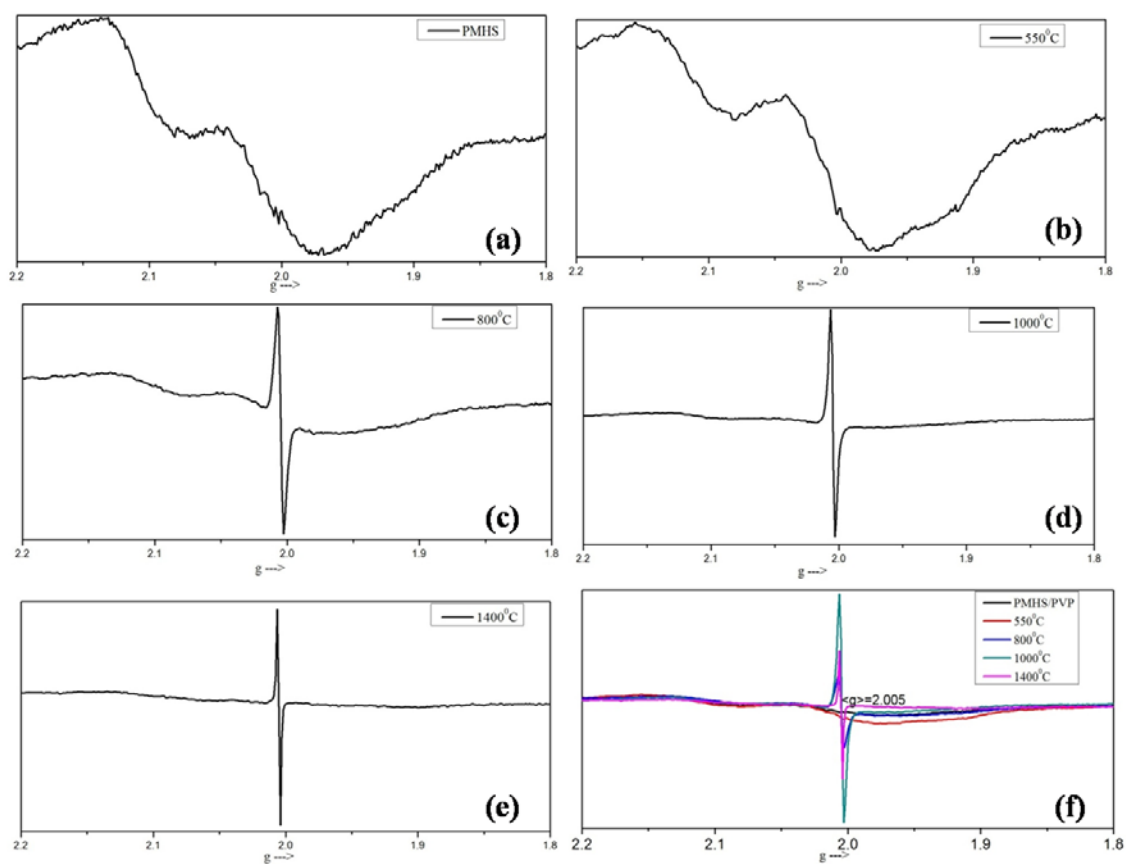

Fig S11: EPR characterization of (a) PMHS/PVP hybrid and silica fibers: (b) 550 °C, (c) 800 °C, (d) 1000 °C, (e) 1400 °C and (f) (a)-(e) superimposed.
